# Supplementary material
Source: MDPI journal article supplement (https://www.mdpi.com/2073-4441/14/1/49)
Supplement: s1 [file s1]

Supplementary Material

# Thiol-Functionalization Carbonaceous Adsorbents for the Removal of Methyl-Mercury from Water in the ppb Levels

Evgenios Kokkinos <sup>1,\*</sup>, Aggeliki Lampou <sup>1</sup>, Ioannis Kellartzis <sup>2</sup>, Dimitrios Karfaridis <sup>3</sup> and Anastasios Zouboulis <sup>1</sup>

<sup>1</sup> Department of Chemistry, Aristotle University of Thessaloniki, 54124 Thessaloniki, Greece; langeliki@chem.auth.gr (A.L.); zouboulis@chem.auth.gr (A.Z.)

<sup>2</sup> Department of Chemical Engineering, Aristotle University of Thessaloniki, 54124 Thessaloniki, Greece; kellar.john@gmail.com

<sup>3</sup> Department of Physics, Aristotle University of Thessaloniki, GR 54124 Thessaloniki, Greece; dkarfari@physics.auth.gr

\* Correspondence: evgenios@chem.auth.gr

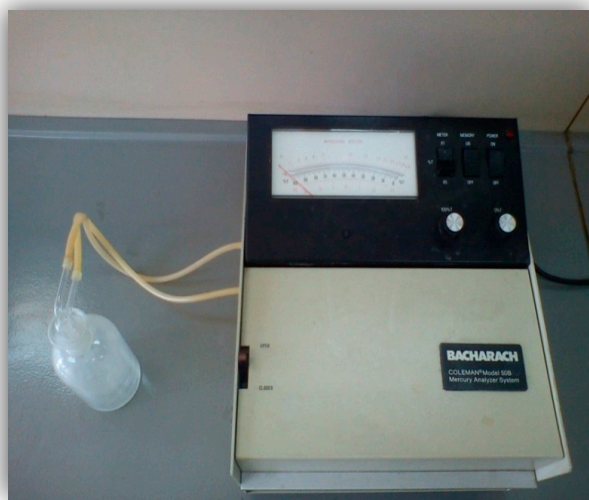

Figure S1. Bacharach cold vapor mercury analyzer system (Coleman-Model 50B).

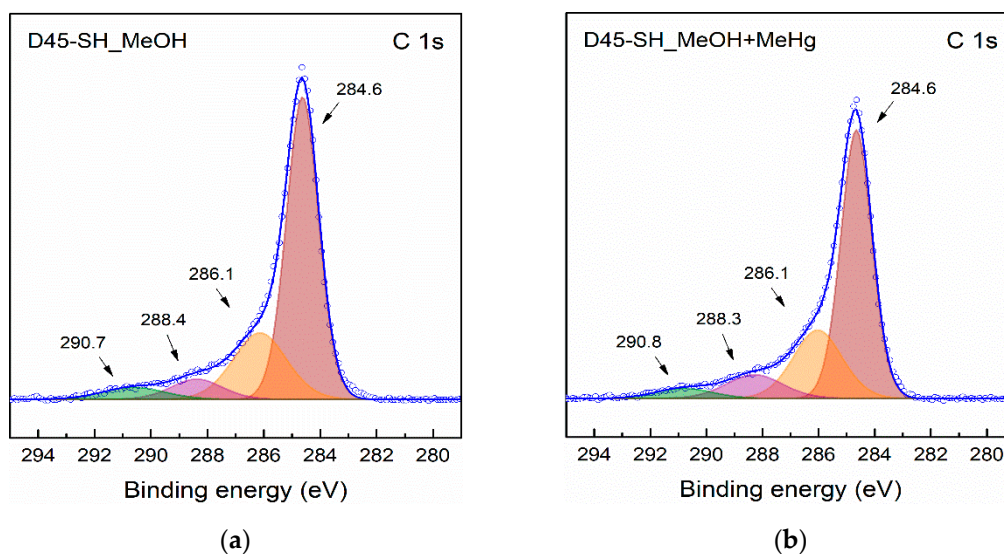

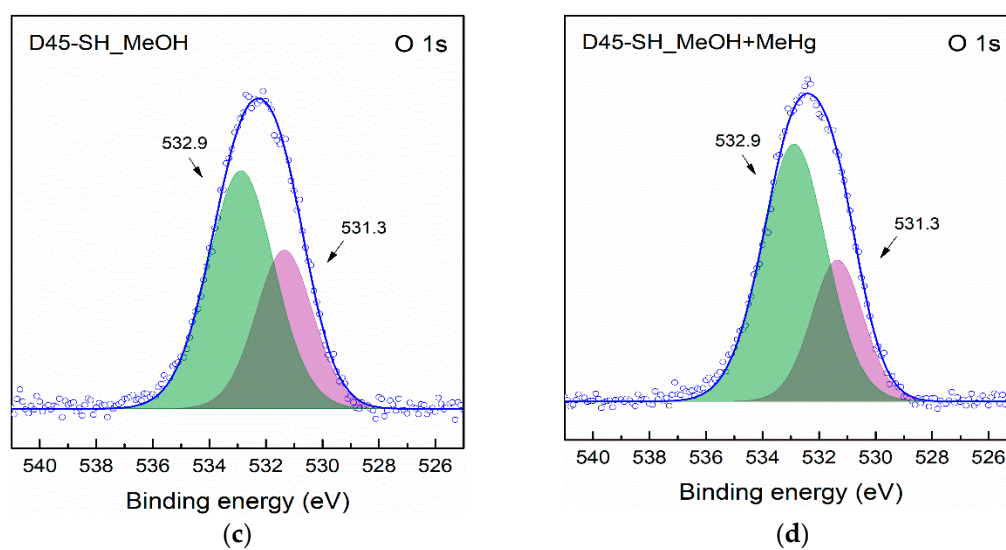

**Figure S2.** High-resolution C 1s and O 1s core-level XPS spectra of D45-SH\_MeOH before (a,c) and after (b,d) MeHg adsorption.
